# Supplementary material for: Mouse models for the study of postnatal cardiac hypertrophy
Source: PubMed Central journal article supplement — Int J Cardiol Heart Vasc. 2015 Mar 6;7:131–40. doi: 10.1016/j.ijcha.2015.02.005 (PMC5497247; doi:10.1016/j.ijcha.2015.02.005), 2015-03-06
Supplement: mmc1.pdf [file mmc1.pdf]

Supplemental Table 1. Oligonucleotides used in this work.

| Gene          | Primer                |                       |
|---------------|-----------------------|-----------------------|
|               | Sense                 | Antisense             |
| $\alpha$ AR   |                       |                       |
| $\beta$ AR    |                       |                       |
| $\alpha$ -MHC | GGCACAGAAGATGCTGACAA  | CTGCCCTTGGTGACATACT   |
| $\beta$ -MHC  | GGCATTGAGTGGACCTTCAT  | TCGAGGCTTCTGGAAGTTGGT |
| GATA-4        | GCAGCAGCAGTGAAGAGATG  | GCGATGTCTGAGTGACAGGA  |
| RNA 18S       | GAGGTGAAATTCTTGGACCGG | TCTTGGCAAATGCTTTCGCT  |

Supplemental Table 2. Comparison HW/BW of offspring of pregnant mice treated with isoproterenol

|     | 15 dpc                      | 17 dpc                       | 19 dpc                      | NB                          | 7 D                         | 15 D                        | 6 W-AD                      | CH-AD                       |
|-----|-----------------------------|------------------------------|-----------------------------|-----------------------------|-----------------------------|-----------------------------|-----------------------------|-----------------------------|
| ISO | 0.017±0.0<br>013*<br>(1.7%) | 0.012±0.0<br>017*<br>(1.2%)  | 0.014±0.0<br>019*<br>(1.4%) | 0.015±0.0<br>007*<br>(1.4%) | 0.016±0.0<br>006*<br>(1.6%) | 0.007±0.0<br>002*<br>(0.6%) | 0.009±0.0<br>004*<br>(0.9%) | 0.008±0.0<br>002*<br>(0.8%) |
| CTR | 0.014±0.0<br>01<br>(1.4%)   | 0.0101±0.<br>0007<br>(1.01%) | 0.012±0.0<br>01<br>(1.4%)   | 0.014±0.0<br>014<br>(1.6%)  | 0.011±0.0<br>008<br>(1.1%)  | 0.003±0.0<br>001<br>(0.4%)  | 0.005±0.0<br>002<br>(0.62%) |                             |

Cardiac hypertrophy was determined by the ratio of the heart weight (mg) to body weight (g). The values are the mean  $\pm$  SME (n=5 animals /age/ group). All comparisons were performed using the Student's t test. \* Indicates significant differences between groups (P<0.05).
